# Supplementary material for: Population-based user-perceived experience of Rheumatic?: a novel digital symptom-checker in rheumatology
Source: HighWire-hosted journal article supplement (doi:10.1136/rmdopen-2022-002974), 2023-04-01
Supplement: rmdopen-2022-002974supp001_data_supplement.pdf [file rmdopen-2022-002974supp001_data_supplement.pdf]

## SUPPLEMENTARY FIGURES

**1. How appropriate did you find the number of questions?**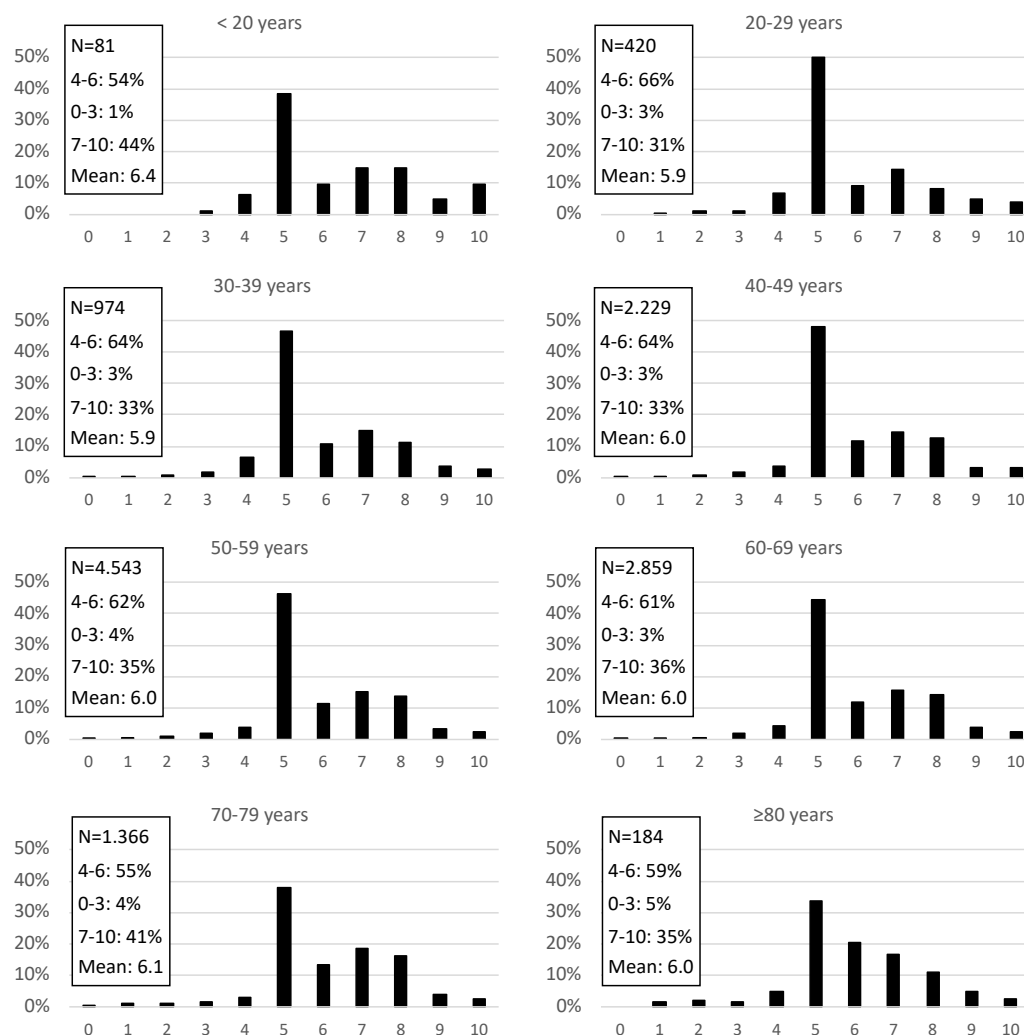

**Supplementary figure 1** Results from the user experience survey, divided based on age groups. X-axes show scores 0-10 (0 = far too few questions; 5 = good number of questions; 10 = far too many questions). Y-axes show the proportion of study participants. Boxes show: total number (N) of study participants, proportion that scored 0-3, 4-6 or 7-10, and mean score, as per age group.

**2. How clear did you find the questions?**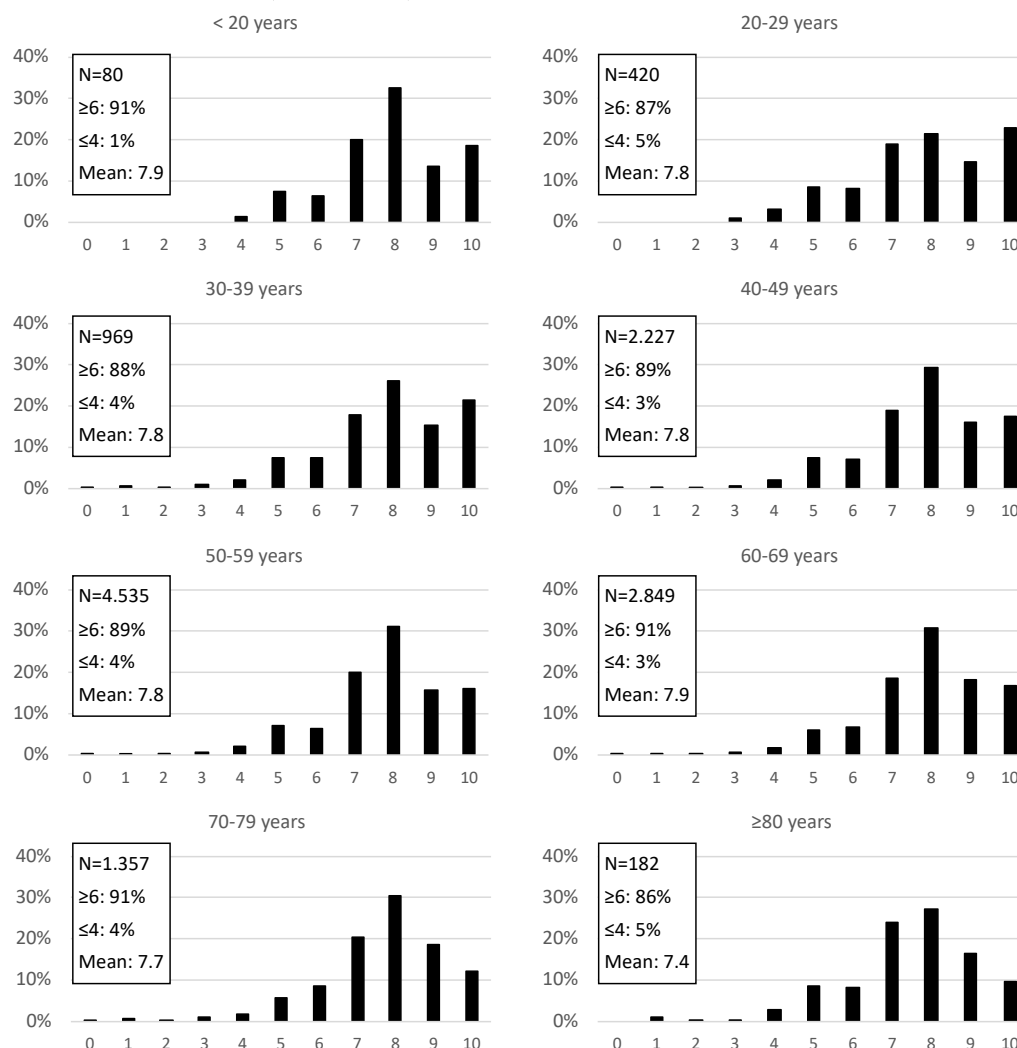

**Supplementary figure 2** Results from the user experience survey, divided based on age groups. X-axes show scores 0-10 (0=completely unclear; 10=very clear). Y-axes show the proportion of study participants. Boxes show: total number (N) of study participants, proportion that scored  $\geq 6$ , proportion that scored  $\leq 4$ , and mean score, as per age group.

**3. How useful did you find Rheumatic?**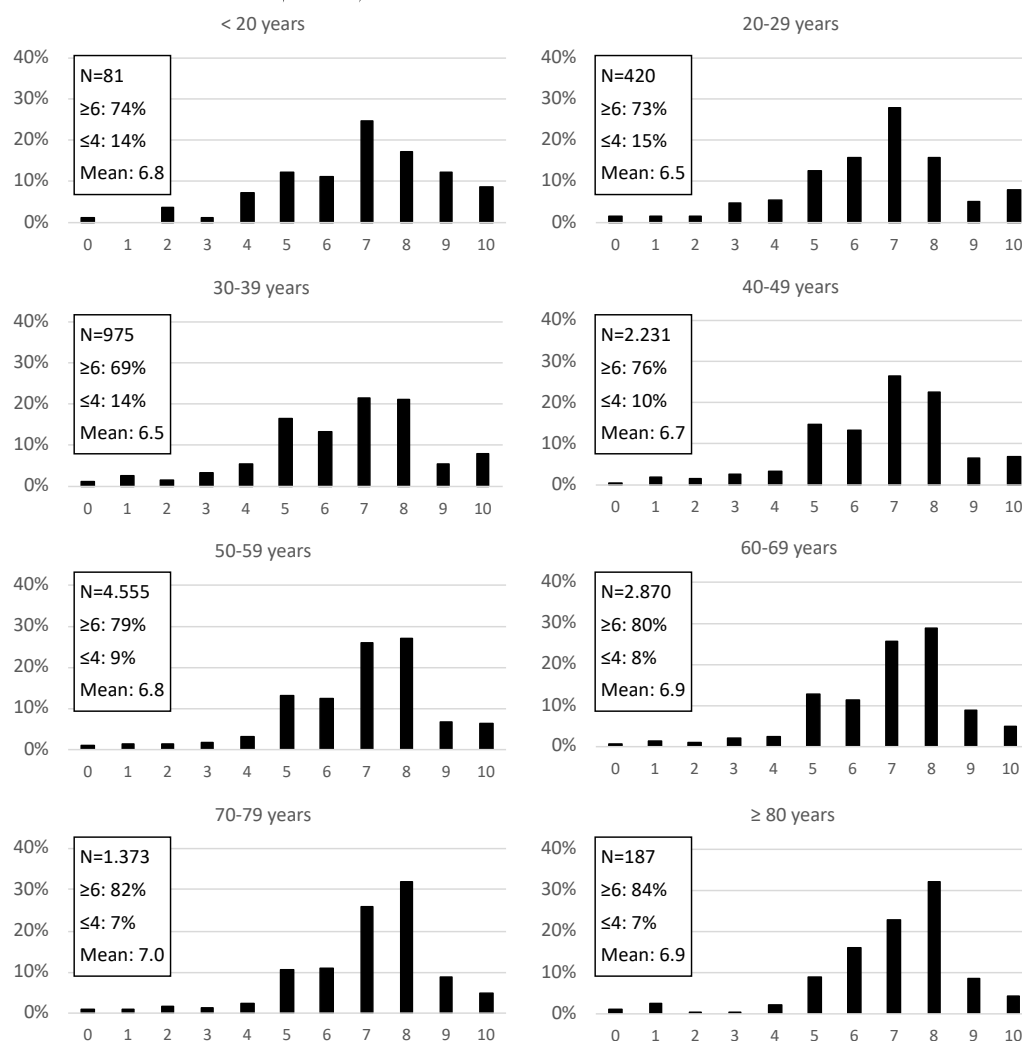

**Supplementary figure 3** Results from the user experience survey, divided based on age groups. X-axes show scores 0-10 (0=not useful; 10=very useful). Y-axes show the proportion of study participants. Boxes show: total number (N) of study participants, proportion that scored  $\geq 6$ , proportion that scored  $\leq 4$ , and mean score, as per age group.

#### 4. To what extent did Rheumatic? give you the opportunity to describe your complaints?

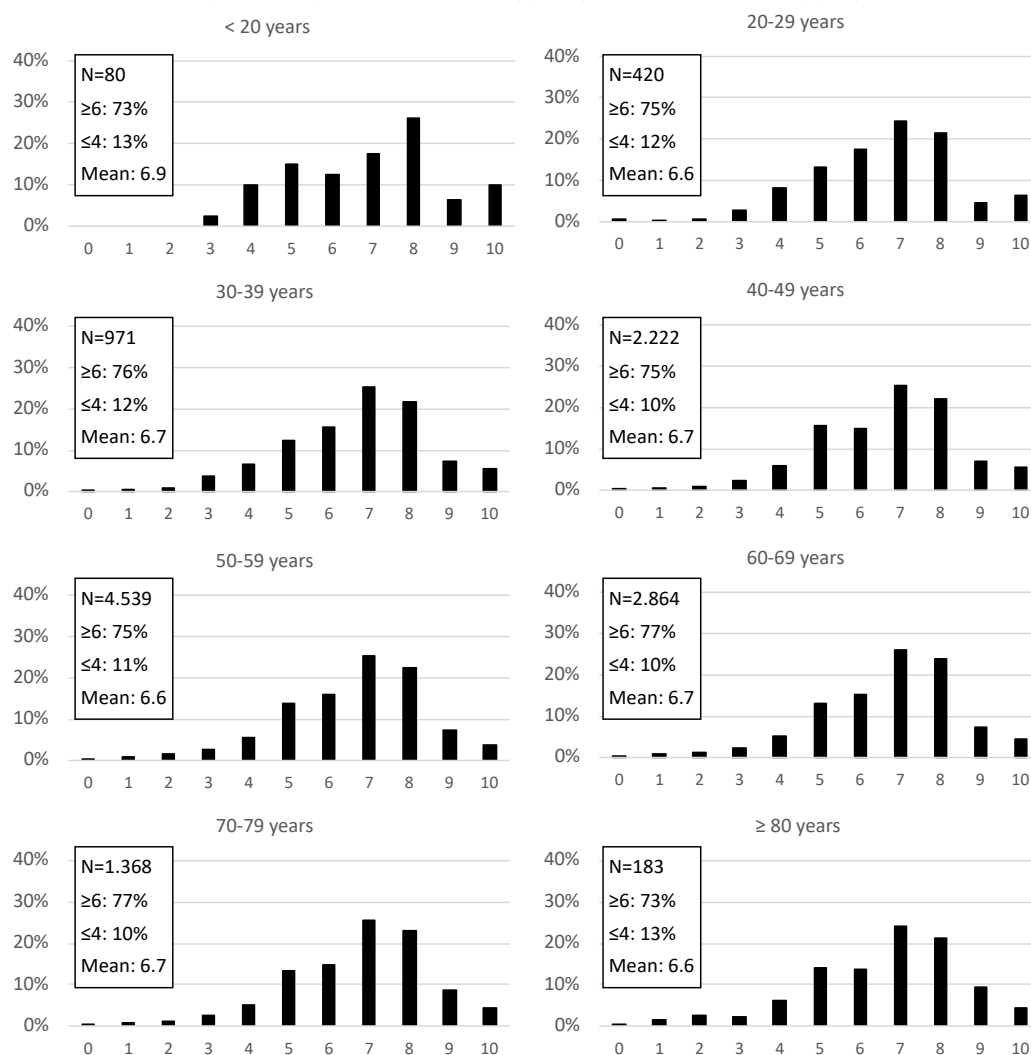

**Supplementary figure 4** Results from the user experience survey, divided based on age groups. X-axes show scores 0-10 (0=very bad, this test cannot give a good picture of my complaints; 10=very good, this test covered all parts of my complaints). Y-axes show the proportion of study participants. Boxes show: total number (N) of study participants, proportion that scored  $\geq 6$ , proportion that scored  $\leq 4$ , and mean score, as per age group.

**5. Would you recommend Rheumatic? to a friend or other patient?**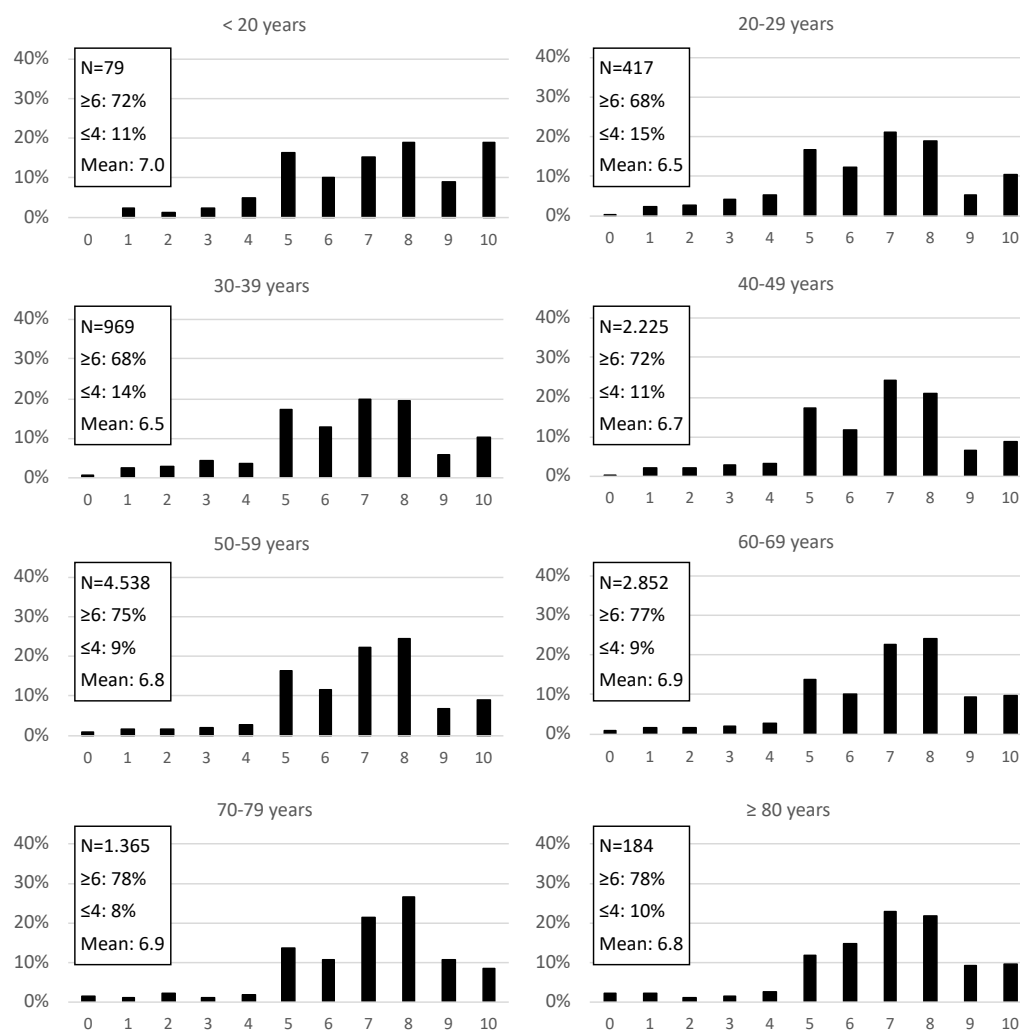

**Supplementary figure 5** Results from the user experience survey, divided based on age groups. X-axes show scores 0-10 (0=definitely not; 10=yes, definitely). Y-axes show the proportion of study participants. Boxes show: total number (N) of study participants, proportion that scored  $\geq 6$ , proportion that scored  $\leq 4$ , and mean score, as per age group.
